# Supplementary material for: First principle studies toward the design of a new class of carbene superbases involving intramolecular H⋯π interactions
Source: Royal Society of Chemistry journal article supplement (doi:10.1039/c1cc11366f), 2011-01-01
Supplement: c1cc11366f.pdf [file c1cc11366f.pdf]

**Electronic Supplementary Information**

**First Principle studies Toward the Design of a New Class of Carbene  
Superbases involving Intramolecular H $\cdots$  $\pi$  Interactions**

**Rabindranath Lo and Bishwajit Ganguly\***

*Analytical Science Discipline, Central Salt & Marine Chemicals Research Institute (CSIR), Bhavnagar,  
Gujarat, India-364002.*

*E-mail: ganguly@csmcri.org.*

## Table of content

| <i>S. No.</i> | <i>Entry name</i>                                                                                                                                                                                                                                | <i>Page No.</i> |
|---------------|--------------------------------------------------------------------------------------------------------------------------------------------------------------------------------------------------------------------------------------------------|-----------------|
| 1             | Computational Section                                                                                                                                                                                                                            | S3              |
| 2             | <b>Table S1</b> Comparison of experimental and computed (B3LYP/6-311+G**//B3LYP/6-31+G*) Proton Affinities (kcal/mol) for some carbenes.                                                                                                         | S5              |
| 3             | <b>Fig. S1</b> Correlation between experimental and calculated proton affinities of carbene bases.                                                                                                                                               | S6              |
| 4             | <b>Table S2</b> Proton affinity values (kcal/mol) calculated at M05-2X/6-311+G**//B3LYP/6-31+G* and MP2/6-311+G**//B3LYP/6-31+G* of carbene <b>5</b> and <b>6</b> .                                                                              | S6              |
| 5             | <b>Table S3</b> Calculated bond lengths (Å), bond angles (°) of the free bases <b>5-9</b> and their corresponding conjugate acids at B3LYP/6-31+G* level of theory.                                                                              | S6              |
| 6             | <b>Fig. S2</b> Representation of the MESP isosurface at -81.6 kcal/mol. $V_{\min}$ in kcal/mol.                                                                                                                                                  | S7              |
| 7             | <b>Fig. S3</b> Correlation between $V_{\min}$ and proton affinity in gas phase for <b>5-9</b> .                                                                                                                                                  | S7              |
| 8             | <b>Scheme S1</b>                                                                                                                                                                                                                                 | S8              |
| 9             | <b>Table S4</b> Comparison of experimental and calculated (B3LYP/6-311+G**//B3LYP/6-31+G*) pKa(MeCN) of some gauge molecules.                                                                                                                    | S8              |
| 10            | <b>Fig. S4</b> Correlation between experimental and calculated pKa of some gauge molecules.                                                                                                                                                      | S8              |
| 11            | <b>Fig. S5</b> Correlation between pKa and proton affinity in gas phase for <b>1-9</b> .                                                                                                                                                         | S9              |
| 12            | <b>Table S5</b> Calculated parameters of carbenes <b>1-9</b> : HOMO energy ( $E_{\text{HOMO}}$ ), HOMO-LUMO gap (HLG) and singlet-triplet energy gap ( $E_{\text{S-T}}$ ).                                                                       | S9              |
| 13            | <b>Fig. S6</b> Correlation between calculated PA in gas phase and $E_{\text{HOMO}}$ of carbene bases.                                                                                                                                            | S10             |
| 14            | <b>Fig. S7</b> HF/6-31G* optimized geometries of compound <b>10</b> and its mono- and bis-protonated form.                                                                                                                                       | S10             |
| 15            | <b>Fig. S8</b> Representation of the MESP isosurface of HF/6-31G* optimized <b>5</b> and <b>10</b> at -81.6 kcal/mol. $V_{\min}$ in kcal/mol.                                                                                                    | S10             |
| 16            | B3LYP/6-311+G**//B3LYP/6-31+G* SCF energies in gas phase (E), B3LYP/6-31+G* zero point vibrational energies (ZPVE), and Cartesian coordinates for <b>1-9</b> and their corresponding monoprotonated cations (All energies are given in Hartree). | S11             |
| 17            | B3LYP/6-311+G**//HF/6-31G* SCF energies in gas phase (E), HF/6-31G* zero point vibrational energies (ZPVE) and Cartesian coordinates for <b>10</b> and their corresponding mono- and bis-protonated cations (All energies are given in Hartree). | S18             |

## Computational Section

Calculations were performed for compound **1-9** with the density functional theory using Becke's three-parameter hybrid functional with correlation formula of Lee, Yang, and Parr (B3LYP).<sup>1</sup> All these species were fully optimized with 6-31+G\* basis set,<sup>2</sup> and harmonic vibrational frequency calculations were used to confirm that the optimized structures were minima, as characterized by positive vibrational frequencies. The geometry optimization of compound **10** was performed at the Hartree-Fock method<sup>3</sup> using 6-31G\* basis set. Single-point calculations were then carried out with the B3LYP/6-311+G\*\* level using HF/6-31G\* optimized geometries. Zero-point vibrational energies (ZPVE) computed at B3LYP/6-31+G\* and HF/6-31G\* level used in the proton affinity calculations are unscaled. Proton affinities calculated at B3LYP/6-311+G\*\*//B3LYP/6-31+G\* and B3LYP/6-311+G\*\*// HF/6-31G\* level employing the general equation:  $PA(B) = (\Delta E_{el}) + (\Delta ZPVE)$ , where  $(\Delta E_{el}) = [E(B) - E(BH^+)]$  and  $(\Delta ZPVE) = [ZPVE(B) - ZPVE(BH^+)]$  are the electronic and the Zero-point vibrational energy contributions to the proton affinity, respectively. Here, B and  $BH^+$ , denote the base in question and its conjugate acid, respectively.

The MESP was calculated using equation 1 where  $Z_A$  was the charge on nucleus A, situated at  $R_A$  and  $\rho(r')$  is the electron density.<sup>4</sup>

$$V(r) = \sum_A \frac{Z_A}{|r-R_A|} - \int \frac{\rho(r')}{|r-r'|} \quad (1)$$

In general, electron rich regions are shown by highly negative MESP whereas electron deficient regions are characterized by positive MESP.<sup>5</sup> The most negative valued point ( $V_{min}$ ) in electron rich regions can be determined from the MESP topography calculation.<sup>6</sup> Molecular electrostatic potential (MESP) calculations have been performed at the B3LYP/6-311+G\*\* level of theory. Solvent effects are taken into account by means of the polarizable continuum model (PCM)<sup>7-11</sup> through single-point energy calculations at the B3LYP/6-311+G\*\* level of theory (using the gas-phase optimized geometries). The pKa value of the acid  $BH^+$  is calculated using the following relation,

$$pKa = \Delta G_{sol} / 2.303RT$$

Where,  $\Delta G_{sol} = \Delta G_{gas} + \Delta \Delta G_{solv} + \Delta G_{corr}$

$\Delta G_{gas}$  is the Gibbs free energy change of the reaction in the gas phase and  $\Delta \Delta G_{solv}$  is the difference in solvation free energies ( $\Delta G_{solv}$ ) between products and reactants.  $\Delta G_{corr}$  is the correction associated to the change in standard state from gas phase (1 atm) to solution (1 mol/L) and its value at 298.15 K is 1.89 kcal/mol.<sup>12</sup>

Now  $\Delta G_{sol}$  can be expressed as:

$$\Delta G_{sol} = G_{gas}(B) + \Delta G_{solv}(B) + G_{gas}(H^+) + \Delta G_{solv}(H^+) - G_{gas}(BH^+) - \Delta G_{solv}(BH^+) + 1.89$$

Here, the value of Gibbs free energy of the proton in the gas phase is set to -6.28 kcal/mol using translational entropy calculated according to the well-known Sackur-Tetrode equation<sup>13</sup> and the value of Gibbs free energy of proton in acetonitrile solvent phase taken as -250.76 kcal/mol.<sup>14</sup>

The  $\Delta G_{\text{solv}}$  values in B3LYP/6-31+G\* optimized geometry with UAHF radii and 'scfvac' keyword using acetonitrile ( $\epsilon = 36.64$ ) as a solvent.<sup>15</sup> Both electrostatic and nonelectrostatic (i.e., cavitation, repulsion and dispersion) terms were included in the calculation of  $\Delta G_{\text{solv}}$  values. All quantum chemical calculations were performed using Gaussian 03, Revision E.01 program.<sup>16</sup>

## References:

- 1 (a) A. D. Becke, *J. Chem. Phys.*, 1993, **98**, 5648; (b) C. Lee, W. Yang and R. G. Parr, *Phys. Rev. B*, 1988, **37**, 785.
- 2 W. J. Hehre, L. Radom, P. v. R Schleyer and J. A. Pople, *Ab initio Molecular Orbital Theory*, Wiley, New York, **1988**.
- 3 C. C. Roothaan, *J. Rev. Mod. Phys.*, 1951, **23**, 69.
- 4 P. Politzer, J. S. Murray, in *Reviews in Computational Chemistry*, vol 2. (Eds: K. B. Lipkowitz, D. B. Boyd) VCH Publishers, New York (ch 7) 1991, **2**, 273.
- 5 (a) J. Tomasi, R. Bonaccorsi and R. Cammi, *Theoretical Models of Chemical Bonding* (Ed: R. Maksic) Springer, Berlin, 1990, 230; (b) R. K. Pathak and S. R. Gadre, *J. Chem. Phys.*, 1990, **93**, 1770; (c) E. Scrocco and J. Tomasi, *Adv. Quantum Chem.*, 1979, **11**, 115; (d) J. S. Murray and P. Politzer, *J. Mol. Struct.: THEOCHEM*, 1998, **425**, 107; (e) T. Brinck, J. S. Murray and P. Politzer, *Mol. Phys.*, 1992, **76**, 609.
- 6 (a) J. S. Murray and P. Politzer, *Chem. Phys. Lett.*, 1988, **152**, 364; (b) M. Haeberlein, J. S. Murray, T. Brinck and P. Politzer, *Can. J. Chem.*, 1992, **70**, 2209; (c) C. H. Suresh, *Inorg. Chem.*, 2006, **45**, 4982.
- 7 J. Tomasi and M. Persico, *Chem. Rev.*, 1994, **94**, 2027.
- 8 M. Cossi, V. Barone, R. Cammi and J. Tomasi, *Chem. Phys. Lett.*, 1996, **255**, 327.
- 9 V. Barone, M. Cossi and J. Tomasi, *J. Chem. Phys.*, 1997, **107**, 3210.
- 10 V. Barone, M. Cossi and J. Tomasi, *J. Comput. Chem.*, 1998, **19**, 404.
- 11 M. Cossi and V. Barone, *J. Chem. Phys.*, 1998, **109**, 6246.
- 12 D. M. Camaioni and C. A. Schwerdtfeger, *J. Phys. Chem. A.*, 2005, **109**, 10795
- 13 I. A. Topol, G. J. Tawa, S. K. Burt and A. A. Rashin, *J. Phys. Chem. A.*, 1997, **101**, 10075.
- 14 A. A. Magill, K. J. Cavell and B. F. Yates, *J. Am. Chem. Soc.*, 2004, **126**, 8717.
- 15 (a) T. N. Brown and N. Mora-Diez, *J. Phys. Chem. B.*, **2006**, *110*, 9270-9279; (b) A. Trummel, A. Rummel, E. Lippmaa, P. Burk and I. A. Koppel, *J. Phys. Chem. A.*, 2009, **113**, 6206.

16 M. J. Frisch, G. W. Trucks, H. B. Schlegel, G. E. Scuseria, M. A. Robb, J. R. Cheeseman, J. A. Montgomery, Jr., T. Vreven, K. N. Kudin, J. C. Burant, J. M. Millam, S. S. Iyengar, J. Tomasi, V. Barone, B. Mennucci, M. Cossi, G. Scalmani, N. Rega, G. A. Petersson, H. Nakatsuji, M. Hada, M. Ehara, K. Toyota, R. Fukuda, J. Hasegawa, M. Ishida, T. Nakajima, Y. Honda, O. Kitao, H. Nakai, M. Klene, X. Li, J. E. Knox, H. P. Hratchian, J. B. Cross, V. Bakken, C. Adamo, J. Jaramillo, R. Gomperts, R. E. Stratmann, O. Yazyev, A. J. Austin, R. Cammi, C. Pomelli, J. W. Ochterski, P. Y. Ayala, K. Morokuma, G. A. Voth, P. Salvador, J. J. Dannenberg, V. G. Zakrzewski, S. Dapprich, A. D. Daniels, M. C. Strain, O. Farkas, D. K. Malick, A. D. Rabuck, K. Raghavachari, J. B. Foresman, J. V. Ortiz, Q. Cui, A. G. Baboul, S. Clifford, J. Cioslowski, B. B. Stefanov, G. Liu, A. Liashenko, P. Piskorz, I. Komaromi, R. L. Martin, D. J. Fox, T. Keith, M. A. Al-Laham, C. Y. Peng, A. Nanayakkara, M. Challacombe, P. M. W. Gill, B. Johnson, W. Chen, M. W. Wong, C. Gonzalez and J. A. Pople, Gaussian 03, Revision E.01, Gaussian, Inc., Wallingford CT, **2004**.

**Table S1** Comparison of experimental and computed (B3LYP/6-311+G\*\*//B3LYP/6-31+G\*) Proton Affinities<sup>[a]</sup> (kcal/mol) for some carbenes.

| Carbene                                                                             | Proton Affinity(gas phase)      |
|-------------------------------------------------------------------------------------|---------------------------------|
| 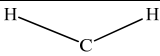 | 206.9(206.3±0.8) <sup>[b]</sup> |
|  | 173.8(172.0±2.0) <sup>[b]</sup> |
|  | 207.0(205.2±1.9) <sup>[c]</sup> |
|  | 212.3(209.7±2.2) <sup>[c]</sup> |
|  | 224.9(230.9) <sup>[d]</sup>     |

<sup>[a]</sup> Experimental Proton Affinity value is given in parenthesis.

<sup>[b]</sup> J. R. Pliego Jr. and W. B. D. Almeida, *J. Chem. Soc., Faraday Trans.*, 1997, **93**, 1881 and references therein.

<sup>[c]</sup> Z. Tian and S. R. Kass, *Int. J. Mass Spectrom.*, 2007, **267**, 288.

<sup>[d]</sup> M. H. Matus, M. T. Nguyen and D. A. Dixon, *J. Phys. Chem. A.*, 2006, **110**, 8864 and references therein.

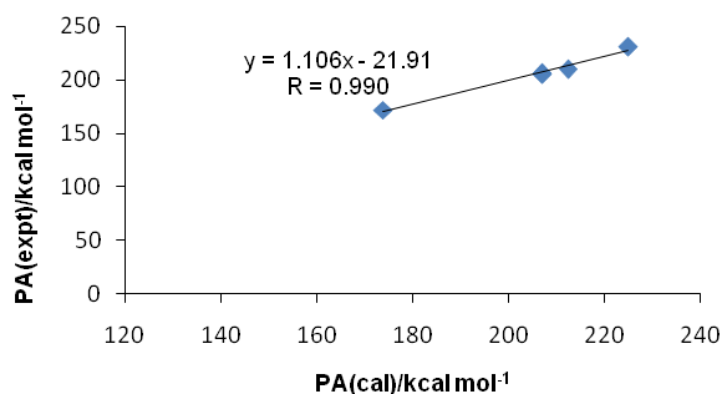

**Fig. S1** Correlation between experimental and calculated proton affinities of carbene bases.

**Table S2** Proton affinity values (kcal/mol) calculated at M05-2X/6-311+G\*\*//B3LYP/6-31+G\* and MP2/6-311+G\*\*//B3LYP/6-31+G\* of carbene **5** and **6**.

|          | M05-2X | MP2   |
|----------|--------|-------|
| <b>5</b> | 280.2  | 281.2 |
| <b>6</b> | 284.5  | 285.8 |

**Table S3** Calculated bond lengths (Å), bond angles (°) of the free bases **5-9** and their corresponding conjugate acids at B3LYP/6-31+G\* level of theory.

|                       | Bond length   |               | Bond angle      |
|-----------------------|---------------|---------------|-----------------|
|                       | C...Ph center | H...Ph center | C-H...Ph center |
| <b>5</b>              | 3.214         |               |                 |
| <b>5H<sup>+</sup></b> | 3.225         | 2.200         | 157.0           |
| <b>6</b>              | 3.317         |               |                 |
| <b>6H<sup>+</sup></b> | 3.359         | 2.27          | 180.0           |
| <b>7</b>              | 3.420         |               |                 |
| <b>7H<sup>+</sup></b> | 3.387         | 2.298         | 180.0           |
| <b>8</b>              | 3.405         |               |                 |

|                       |       |       |       |
|-----------------------|-------|-------|-------|
| <b>8H<sup>+</sup></b> | 3.402 | 2.313 | 180.0 |
| <b>9</b>              | 3.410 |       |       |
| <b>9H<sup>+</sup></b> | 3.360 | 2.269 | 180.0 |

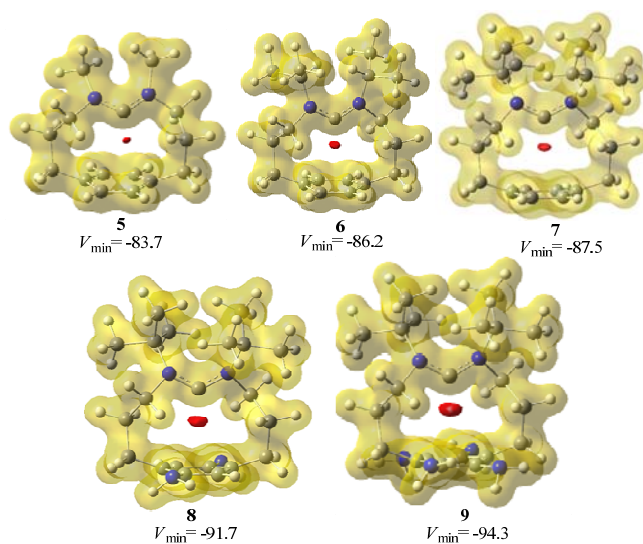

**Fig. S2** Representation of the MESP isosurface at  $-81.6$  kcal/mol.  $V_{\min}$  in kcal/mol.

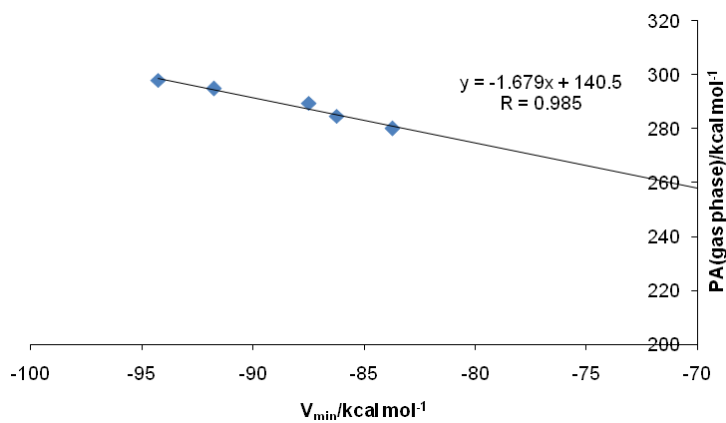

**Fig. S3** Correlation between  $V_{\min}$  and proton affinity in gas phase for **5-9**.

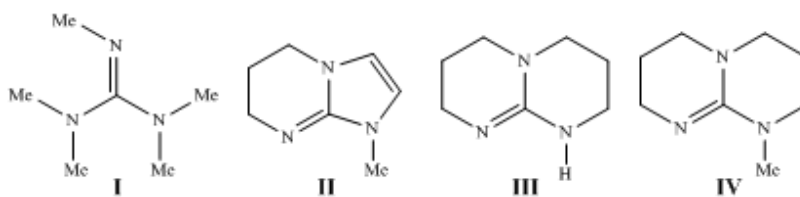

**Scheme S1**

**Table S4** Comparison of experimental and calculated (B3LYP/6-311+G\*\*//B3LYP/6-31+G\*) pKa(MeCN) of some gauge molecules.

| Compounds  | pKa(MeCN)                   |            |
|------------|-----------------------------|------------|
|            | Experimental <sup>[a]</sup> | Calculated |
| <b>I</b>   | 25.0                        | 24.1       |
| <b>II</b>  | 24.55                       | 23.03      |
| <b>III</b> | 25.96                       | 26.54      |
| <b>IV</b>  | 25.43                       | 25.86      |

<sup>[a]</sup>B. Kovačević and Z. B. Maksić, *Org. Lett.*, 2001, **3**, 1523.

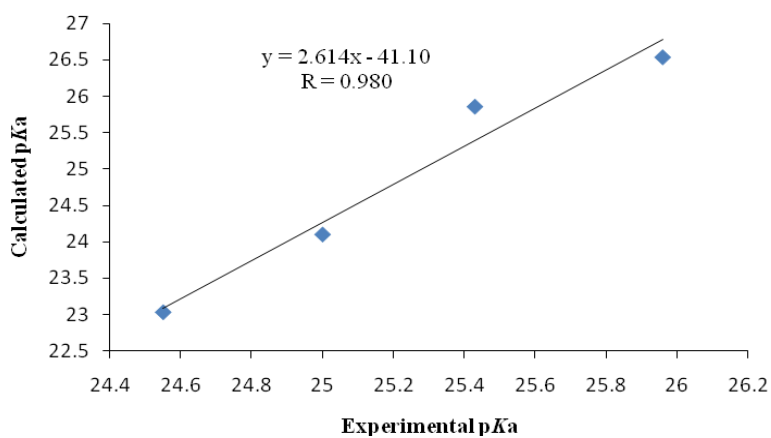

**Fig. S4** Correlation between experimental and calculated pKa of some gauge molecules.



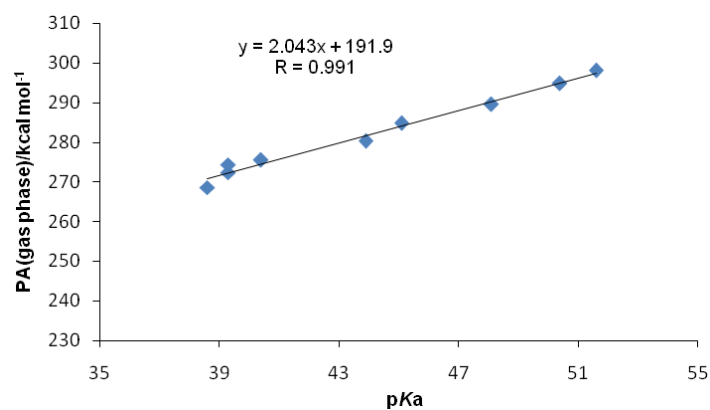

**Fig. S5** Correlation between pKa and proton affinity in gas phase for **1-9**.

**Table S5** Calculated parameters of carbenes **1-9**: HOMO energy ( $E_{\text{HOMO}}$ ), HOMO-LUMO gap (HLG) and singlet-triplet energy gap ( $E_{\text{S-T}}$ ). ( $E_{\text{HOMO}}$ , HLG in eV;  $E_{\text{S-T}}$  in kcal/mol).

| Carbene  | $E_{\text{HOMO}}$ | HLG  | $E_{\text{S-T}}$ |
|----------|-------------------|------|------------------|
| <b>1</b> | -4.98             | 4.90 | 41.9             |
| <b>2</b> | -4.73             | 4.59 | 37.8             |
| <b>3</b> | -4.80             | 4.73 | 41.5             |
| <b>4</b> | -4.67             | 4.55 | 43.0             |
| <b>5</b> | -4.72             | 4.45 | 38.1             |
| <b>6</b> | -4.49             | 4.25 | 39.0             |
| <b>7</b> | -4.03             | 3.78 | 17.8             |
| <b>8</b> | -3.82             | 3.63 | 17.9             |
| <b>9</b> | -3.72             | 3.44 | 17.5             |

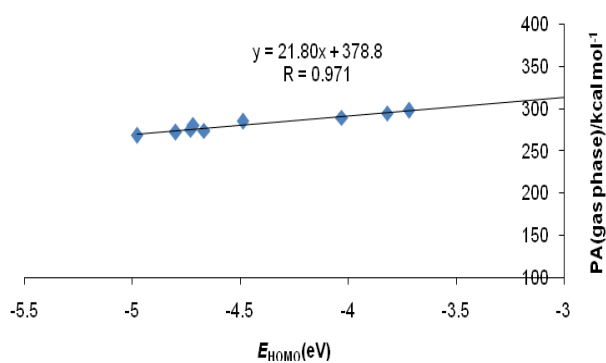

**Fig. S6** Correlation between calculated PA in gas phase and  $E_{\text{HOMO}}$  of carbene bases.

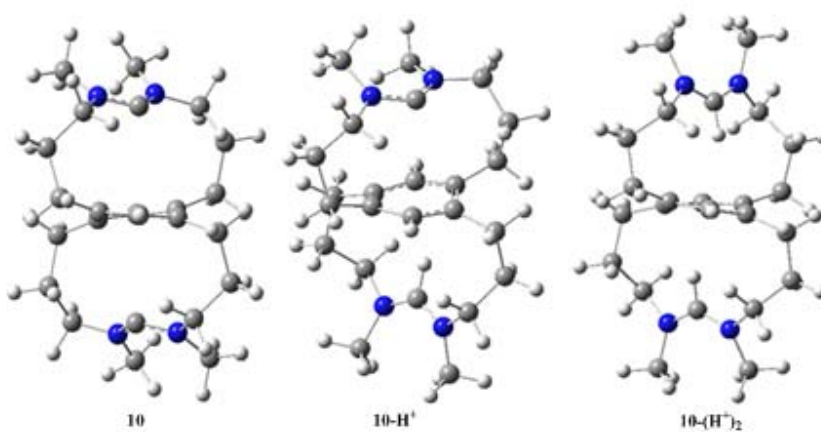

**Fig. S7** HF/6-31G\* optimized geometries of compound **10** and its mono- and bis-protonated form [Gray = carbon; blue = nitrogen; white = hydrogen].

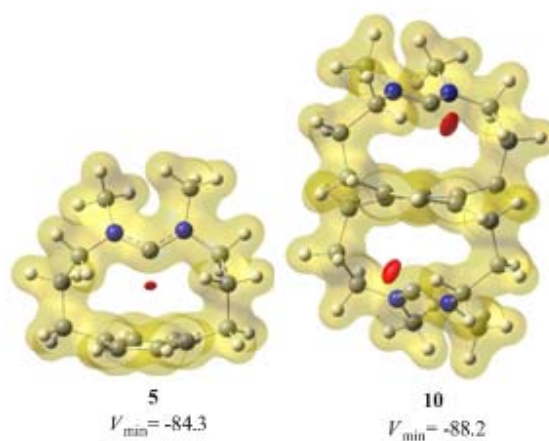

**Fig. S8** Representation of the MESP isosurface of HF/6-31G\* optimized **5** and **10** at -81.6 kcal/mol.  $V_{\text{min}}$  in kcal/mol.

**B3LYP/6-311+G\*\*//B3LYP/6-31+G\* SCF energies in gas phase (E), B3LYP/6-31+G\* zero point vibrational energies (ZPVE), and Cartesian coordinates for 1-9 and their corresponding monoprotonated cations (All energies are given in Hartree).**

**1**

E = -307.27343

ZPVE = 0.170815

|   |             |             |             |
|---|-------------|-------------|-------------|
| C | 0.00004700  | -0.81736700 | 0.00001400  |
| N | 1.16886900  | -0.13776100 | -0.01813600 |
| N | -1.16882500 | -0.13792800 | 0.01767700  |
| C | -2.38094000 | -0.93629800 | 0.19973800  |
| H | -2.97043500 | -0.55558100 | 1.04567600  |
| H | -3.01219700 | -0.90322700 | -0.70122200 |
| H | -2.08649700 | -1.96607100 | 0.40037500  |
| C | -1.45959000 | 1.26431600  | -0.33053000 |
| H | -2.37062500 | 1.28795100  | -0.94046800 |
| H | -1.63314400 | 1.89551000  | 0.55226700  |
| H | -0.65247700 | 1.69014900  | -0.92605500 |
| C | 1.45946100  | 1.26425700  | 0.33062500  |
| H | 1.63315500  | 1.89583400  | -0.55188800 |
| H | 0.65221100  | 1.68993900  | 0.92610200  |
| H | 2.37034300  | 1.28782700  | 0.94081300  |
| C | 2.38101100  | -0.93621600 | -0.19958400 |
| H | 2.08658900  | -1.96581600 | -0.40106300 |
| H | 2.97127300  | -0.55509100 | -1.04481900 |
| H | 3.01156100  | -0.90375600 | 0.70192000  |

**1H<sup>+</sup>**

E = -307.71688

ZPVE = 0.186217

|   |             |             |             |
|---|-------------|-------------|-------------|
| C | -0.00000100 | -0.65172700 | 0.00000500  |
| N | 1.20493500  | -0.10220200 | 0.02592800  |
| N | -1.20493700 | -0.10220000 | -0.02592500 |
| C | -2.38324200 | -0.97004600 | 0.17168000  |
| H | -2.94165600 | -0.62916400 | 1.04897100  |
| H | -3.02837700 | -0.91801600 | -0.71009700 |
| H | -2.07173000 | -2.00293200 | 0.33412300  |
| C | -1.52413200 | 1.31740800  | -0.25735500 |
| H | -2.46002200 | 1.35693500  | -0.81938500 |
| H | -1.66436800 | 1.85073200  | 0.68842900  |
| H | -0.75053100 | 1.79785600  | -0.85326700 |
| C | 1.52414000  | 1.31740500  | 0.25735400  |
| H | 1.66439000  | 1.85071900  | -0.68843300 |
| H | 0.75053800  | 1.79786600  | 0.85325300  |
| H | 2.46002400  | 1.35692600  | 0.81939400  |
| C | 2.38323700  | -0.97005000 | -0.17168300 |
| H | 2.07172100  | -2.00292700 | -0.33417300 |
| H | 2.94167200  | -0.62913900 | -1.04894900 |
| H | 3.02835400  | -0.91805600 | 0.71010900  |
| H | -0.00000200 | -1.73791900 | -0.00000200 |

**2**

E = -464.56668

ZPVE = 0.284671

|   |             |             |             |
|---|-------------|-------------|-------------|
| C | 0.00000500  | 1.40849600  | -0.00005500 |
| N | 1.18994000  | 0.76992800  | 0.11316900  |
| N | -1.18992800 | 0.76991800  | -0.11325200 |
| C | -2.32873100 | 1.67260200  | -0.34172500 |
| H | -2.96903300 | 1.29657700  | -1.14976000 |
| H | -2.94243400 | 1.79245100  | 0.56039900  |
| H | -1.92903900 | 2.64403500  | -0.62651200 |
| C | -1.57833400 | -0.65550800 | 0.10981000  |
| H | -0.73152700 | -1.13583000 | 0.59601500  |
| C | 1.57835800  | -0.65550600 | -0.10984300 |
| H | 0.73158900  | -1.13582500 | -0.59611200 |
| C | 2.32871700  | 1.67261400  | 0.34176000  |
| H | 1.92898600  | 2.64405300  | 0.62647300  |
| H | 2.96892300  | 1.29661300  | 1.14988400  |
| H | 2.94252900  | 1.79244100  | -0.56029100 |
| C | -2.75224900 | -0.78915800 | 1.09648600  |
| H | -3.69944100 | -0.43951700 | 0.67225200  |
| H | -2.88097000 | -1.84619200 | 1.35948800  |
| H | -2.55912400 | -0.23103000 | 2.01937400  |
| C | -1.88220300 | -1.38818000 | -1.20780000 |
| H | -2.09325800 | -2.44862000 | -1.01832400 |
| H | -2.76019300 | -0.96018300 | -1.70539300 |
| H | -1.04081100 | -1.32509900 | -1.90661600 |
| C | 1.88208100  | -1.38816500 | 1.20780500  |
| H | 2.09312700  | -2.44861400 | 1.01836500  |
| H | 2.76003500  | -0.96018400 | 1.70547700  |
| H | 1.04062200  | -1.32505300 | 1.90653900  |
| C | 2.75235700  | -0.78920100 | -1.09641500 |
| H | 3.69952200  | -0.43958500 | -0.67210100 |
| H | 2.88107100  | -1.84624300 | -1.35939100 |
| H | 2.55933300  | -0.23108200 | -2.01932800 |

**2H<sup>+</sup>**

E = -465.02113

ZPVE = 0.300148

|   |             |             |             |
|---|-------------|-------------|-------------|
| C | -0.00000100 | 1.25899600  | -0.00000200 |
| N | -1.21713200 | 0.73422500  | -0.08825500 |
| N | 1.21713000  | 0.73422700  | 0.08825400  |
| C | 2.32729300  | 1.67661700  | 0.35430200  |
| H | 2.93711300  | 1.29837500  | 1.17774200  |
| H | 2.95196200  | 1.79448000  | -0.53393100 |
| H | 1.92972500  | 2.64885400  | 0.64732700  |
| C | 1.60807200  | -0.69942400 | -0.11978600 |
| H | 0.75678200  | -1.17411600 | -0.60438300 |
| C | -1.60807200 | -0.69942500 | 0.11979400  |
| H | -0.75678900 | -1.17410900 | 0.60441000  |
| C | -2.32729600 | 1.67661200  | -0.35430900 |
| H | -1.92972900 | 2.64884800  | -0.64733900 |
| H | -2.93711500 | 1.29836500  | -1.17774700 |
| H | -2.95196500 | 1.79447900  | 0.53392400  |
| C | 2.78720100  | -0.80468600 | -1.09757000 |
| H | 3.72534700  | -0.44439200 | -0.66487300 |

|   |             |             |             |
|---|-------------|-------------|-------------|
| H | 2.93059900  | -1.86019000 | -1.34951600 |
| H | 2.59261700  | -0.26179200 | -2.02860600 |
| C | 1.90137800  | -1.39550200 | 1.21579300  |
| H | 2.10648200  | -2.45584100 | 1.03547500  |
| H | 2.78390900  | -0.97120100 | 1.70584500  |
| H | 1.05977500  | -1.32527400 | 1.91327800  |
| C | -1.90135600 | -1.39551800 | -1.21578100 |
| H | -2.10646000 | -2.45585600 | -1.03545500 |
| H | -2.78388100 | -0.97122500 | -1.70585200 |
| H | -1.05974200 | -1.32529600 | -1.91325400 |
| C | -2.78721700 | -0.80467900 | 1.09756100  |
| H | -3.72535500 | -0.44438600 | 0.66484700  |
| H | -2.93061900 | -1.86018100 | 1.34951200  |
| H | -2.59264600 | -0.26178000 | 2.02859700  |
| H | -0.00000200 | 2.34511700  | -0.00000600 |

### 3

E = -464.57402

ZPVE = 0.283731

|   |             |             |             |
|---|-------------|-------------|-------------|
| C | -0.00002200 | -0.11974200 | -0.00006500 |
| N | -1.16292100 | 0.56190800  | 0.04865000  |
| N | 1.16288200  | 0.56185800  | -0.04883700 |
| C | 2.40388700  | -0.25215600 | -0.19712200 |
| H | 3.20198200  | 0.47404900  | -0.40110400 |
| C | 1.42373200  | 1.93841700  | 0.41611800  |
| H | 2.30714000  | 1.93228600  | 1.06491200  |
| H | 1.61625400  | 2.63884500  | -0.40820800 |
| H | 0.58660300  | 2.30534900  | 1.01047000  |
| C | -1.42385600 | 1.93837100  | -0.41649100 |
| H | -1.61695700 | 2.63878300  | 0.40771700  |
| H | -0.58653800 | 2.30549100  | -1.01044500 |
| H | -2.30694300 | 1.93199900  | -1.06573400 |
| C | -2.40387700 | -0.25215100 | 0.19705200  |
| H | -3.20208600 | 0.47407100  | 0.40053700  |
| C | 2.32949600  | -1.19982400 | -1.39661500 |
| H | 2.08706500  | -0.64883500 | -2.31284700 |
| H | 3.29695200  | -1.69837600 | -1.53794000 |
| H | 1.55808700  | -1.95901500 | -1.24192000 |
| C | 2.73905900  | -0.99659500 | 1.10277000  |
| H | 2.82252500  | -0.30492100 | 1.95032300  |
| H | 1.94751400  | -1.71909900 | 1.32736900  |
| H | 3.69158700  | -1.53282700 | 1.00944600  |
| C | -2.32970200 | -1.19924700 | 1.39701900  |
| H | -1.55818500 | -1.95847700 | 1.24298500  |
| H | -2.08754400 | -0.64778000 | 2.31303000  |
| H | -3.29714500 | -1.69783400 | 1.53832200  |
| C | -2.73868900 | -0.99721900 | -1.10256200 |
| H | -3.69100800 | -1.53380700 | -1.00910000 |
| H | -2.82239600 | -0.30590200 | -1.95037900 |
| H | -1.94681100 | -1.71948000 | -1.32674900 |

### 3H<sup>+</sup>

E = -465.02384

ZPVE = 0.299498

|   |            |            |             |
|---|------------|------------|-------------|
| C | 0.00000000 | 0.04724900 | -0.00000800 |
|---|------------|------------|-------------|

|   |             |             |             |
|---|-------------|-------------|-------------|
| N | 1.20373500  | 0.59480900  | -0.06215600 |
| N | -1.20373200 | 0.59481400  | 0.06213900  |
| C | -2.40583000 | -0.29727000 | 0.27031600  |
| H | -3.16195200 | 0.38744100  | 0.66708900  |
| C | -1.52170200 | 2.00627500  | -0.21064600 |
| H | -2.47139500 | 2.03768500  | -0.74911000 |
| H | -1.63063500 | 2.57632800  | 0.71777300  |
| H | -0.76445400 | 2.46275400  | -0.84578000 |
| C | 1.52170100  | 2.00627300  | 0.21061600  |
| H | 1.63057200  | 2.57633600  | -0.71780400 |
| H | 0.76448300  | 2.46273500  | 0.84580000  |
| H | 2.47142600  | 2.03769300  | 0.74902400  |
| C | 2.40582900  | -0.29728100 | -0.27032600 |
| H | 3.16194000  | 0.38741000  | -0.66715300 |
| C | -2.16949300 | -1.38185600 | 1.32474300  |
| H | -1.74931800 | -0.96583600 | 2.24668700  |
| H | -3.13090400 | -1.84201600 | 1.57329800  |
| H | -1.51884300 | -2.18855200 | 0.96814400  |
| C | -2.89153800 | -0.86255700 | -1.06912200 |
| H | -3.07972600 | -0.07251700 | -1.80379300 |
| H | -2.15828100 | -1.55909500 | -1.49272600 |
| H | -3.82759100 | -1.41099700 | -0.92194700 |
| C | 2.16946000  | -1.38192000 | -1.32469000 |
| H | 1.51881900  | -2.18859700 | -0.96803200 |
| H | 1.74926000  | -0.96594600 | -2.24664400 |
| H | 3.13086400  | -1.84209200 | -1.57324800 |
| C | 2.89157100  | -0.86250600 | 1.06912700  |
| H | 3.82761800  | -1.41095700 | 0.92195200  |
| H | 3.07978200  | -0.07243300 | 1.80375600  |
| H | 2.15832100  | -1.55902100 | 1.49278300  |
| H | -0.00000200 | -1.03612600 | -0.00001000 |

### 4

E = -543.21455

ZPVE = 0.339826

|   |             |             |             |
|---|-------------|-------------|-------------|
| C | -0.00001900 | -0.24573800 | -0.00005200 |
| N | -1.16007400 | 0.45224600  | -0.03158300 |
| N | 1.16003500  | 0.45216100  | 0.03181900  |
| C | 2.43500100  | -0.34913000 | -0.06188600 |
| C | -2.43500900 | -0.34917400 | 0.06188700  |
| C | 3.55517500  | 0.54549500  | -0.63110200 |
| H | 3.26099500  | 0.96671200  | -1.60009700 |
| H | 3.82723700  | 1.37095200  | 0.03444500  |
| H | 4.45726900  | -0.05667900 | -0.78549100 |
| C | 2.82100400  | -0.88713800 | 1.33061100  |
| H | 3.73849000  | -1.48532800 | 1.27224800  |
| H | 3.00036000  | -0.07976200 | 2.05070000  |
| H | 2.01630100  | -1.52174300 | 1.71689100  |
| C | -3.55584900 | 0.54574400  | 0.62933900  |
| H | -3.82856400 | 1.36967900  | -0.03782200 |
| H | -4.45746500 | -0.05684500 | 0.78488700  |
| H | -3.26203300 | 0.96905200  | 1.59753100  |
| C | -2.81975300 | -0.88857800 | -1.33040000 |
| H | -3.73776100 | -1.48601200 | -1.27247300 |
| H | -2.99759900 | -0.08186400 | -2.05161300 |

|   |             |             |             |
|---|-------------|-------------|-------------|
| H | -2.01503300 | -1.52418600 | -1.71498400 |
| C | -2.24684700 | -1.53137600 | 1.02814800  |
| H | -1.49980700 | -2.23430200 | 0.65815100  |
| H | -1.91845800 | -1.17916400 | 2.01281100  |
| H | -3.20498900 | -2.05309000 | 1.14780100  |
| C | 2.24635900  | -1.53238900 | -1.02676400 |
| H | 3.20500900  | -2.05279300 | -1.14807400 |
| H | 1.50119100  | -2.23615700 | -0.65459000 |
| H | 1.91525600  | -1.18150100 | -2.01097100 |
| C | 1.30720700  | 1.79496000  | 0.63198100  |
| H | 2.11770800  | 1.78447100  | 1.36648700  |
| H | 1.52636900  | 2.58155000  | -0.10043500 |
| H | 0.39292300  | 2.05218200  | 1.16776100  |
| C | -1.30726100 | 1.79496100  | -0.63192700 |
| H | -2.11747000 | 1.78426700  | -1.36676300 |
| H | -1.52685500 | 2.58156400  | 0.10034500  |
| H | -0.39285100 | 2.05233300  | -1.16740200 |

#### 4H<sup>+</sup>

E = -543.66812

ZPVE = 0.356156

|   |             |             |             |
|---|-------------|-------------|-------------|
| C | -0.00000500 | -0.08074300 | 0.00000700  |
| N | -1.20000600 | 0.47898900  | -0.09888500 |
| N | 1.19999700  | 0.47898400  | 0.09890700  |
| C | 2.46399200  | -0.37446500 | -0.05427300 |
| C | -2.46399300 | -0.37447000 | 0.05427000  |
| C | 3.43504000  | 0.39964200  | -0.96600300 |
| H | 2.99044100  | 0.58737300  | -1.94973800 |
| H | 3.75026900  | 1.35451000  | -0.53638400 |
| H | 4.33878900  | -0.19909700 | -1.11379300 |
| C | 3.07646900  | -0.62041300 | 1.33715000  |
| H | 3.97072200  | -1.24311400 | 1.23357900  |
| H | 3.38572700  | 0.30338700  | 1.83517100  |
| H | 2.37267800  | -1.14757100 | 1.99071100  |
| C | -3.43495500 | 0.39949700  | 0.96621000  |
| H | -3.75021400 | 1.35443900  | 0.53677900  |
| H | -4.33869700 | -0.19925800 | 1.11397700  |
| H | -2.99027200 | 0.58705900  | 1.94994000  |
| C | -3.07658600 | -0.62018000 | -1.33714300 |
| H | -3.97086400 | -1.24284800 | -1.23360000 |
| H | -3.38582900 | 0.30371500  | -1.83500100 |
| H | -2.37287100 | -1.14727500 | -1.99083600 |
| C | -2.14907000 | -1.72612100 | 0.71735300  |
| H | -1.58034600 | -2.40304100 | 0.07026400  |
| H | -1.62334900 | -1.60767300 | 1.67170900  |
| H | -3.09738700 | -2.22826100 | 0.92853800  |
| C | 2.14912600  | -1.72600800 | -0.71760000 |
| H | 3.09746200  | -2.22813000 | -0.92874600 |
| H | 1.58031400  | -2.40301600 | -0.07068000 |
| H | 1.62352600  | -1.60740800 | -1.67200200 |
| C | 1.40172000  | 1.88066800  | 0.51090200  |
| H | 2.27417800  | 1.92652700  | 1.16186500  |
| H | 1.57094300  | 2.54343900  | -0.34159100 |
| H | 0.54476100  | 2.22533100  | 1.08706500  |
| C | -1.40173400 | 1.88067000  | -0.51088700 |

|   |             |             |             |
|---|-------------|-------------|-------------|
| H | -2.27418000 | 1.92651300  | -1.16186700 |
| H | -1.57098100 | 2.54344200  | 0.34159900  |
| H | -0.54476700 | 2.22533800  | -1.08703600 |
| H | -0.00001000 | -1.15865600 | 0.00000700  |

#### 5

E = -694.44211

ZPVE = 0.346885

|   |             |             |             |
|---|-------------|-------------|-------------|
| C | 0.10702900  | -2.42899400 | -0.95101200 |
| C | 1.43274500  | -2.00430600 | -0.90052100 |
| C | 1.94651300  | -1.39488700 | 0.25134000  |
| C | 1.15562700  | -1.40908300 | 1.40787600  |
| C | -0.17201700 | -1.83361600 | 1.35692900  |
| C | -0.74245100 | -2.25051400 | 0.14697700  |
| H | -0.29915500 | -2.80686700 | -1.88789900 |
| H | 2.05050900  | -2.06739600 | -1.79494700 |
| H | 1.55152900  | -1.00067100 | 2.33684300  |
| H | -0.79325700 | -1.75833300 | 2.24781200  |
| C | 3.19747200  | -0.55096900 | 0.18039400  |
| H | 3.86182000  | -0.73765900 | 1.03543100  |
| H | 3.76791800  | -0.80329400 | -0.72337500 |
| C | -2.23735000 | -2.27281400 | -0.05438300 |
| H | -2.76017800 | -2.46903500 | 0.89207400  |
| H | -2.52048900 | -3.07818000 | -0.74537700 |
| C | 2.84811800  | 0.96602600  | 0.16472500  |
| H | 2.44173800  | 1.23070700  | 1.14857800  |
| H | 3.78556900  | 1.52868900  | 0.05434600  |
| C | -2.73765400 | -0.92642200 | -0.65382100 |
| H | -2.15372900 | -0.69338300 | -1.54916700 |
| H | -3.78045100 | -1.07078500 | -0.96878000 |
| C | 1.82751600  | 1.40694400  | -0.92844400 |
| H | 1.59319800  | 0.58047900  | -1.59903400 |
| H | 2.26132300  | 2.21249400  | -1.53714700 |
| C | -0.49620300 | 1.02010700  | -0.42289100 |
| C | -2.68662800 | 0.28941900  | 0.30372500  |
| H | -2.47214400 | -0.05147300 | 1.32747600  |
| H | -3.68159400 | 0.74665500  | 0.34094200  |
| N | -1.73741300 | 1.38405100  | -0.03105200 |
| N | 0.53477400  | 1.89276800  | -0.39892600 |
| C | 0.65354500  | 3.22696600  | 0.23060300  |
| H | 0.43999500  | 4.04313600  | -0.47362600 |
| H | -0.00325100 | 3.31447800  | 1.09588400  |
| H | 1.68012000  | 3.35809300  | 0.58668200  |
| C | -2.29329400 | 2.72357100  | 0.25142300  |
| H | -2.30259300 | 2.97330400  | 1.32317100  |
| H | -1.73781800 | 3.48658900  | -0.29065800 |
| H | -3.32839700 | 2.75615100  | -0.10690100 |

#### 5H<sup>+</sup>

E = -694.90456

ZPVE = 0.362867

|   |             |             |             |
|---|-------------|-------------|-------------|
| C | -0.43917600 | -2.23087000 | -1.10698300 |
| C | 0.95020700  | -2.09211100 | -1.05581400 |
| C | 1.59937700  | -1.77089700 | 0.14717900  |

|   |             |             |             |
|---|-------------|-------------|-------------|
| C | 0.83656100  | -1.78074900 | 1.32471300  |
| C | -0.55224000 | -1.92747100 | 1.27521500  |
| C | -1.21986800 | -2.05847100 | 0.04612900  |
| H | -0.92373800 | -2.41190800 | -2.06443000 |
| H | 1.52971700  | -2.18181500 | -1.97254500 |
| H | 1.32237400  | -1.61624500 | 2.28454800  |
| H | -1.12608100 | -1.88973700 | 2.19898000  |
| C | 3.01181400  | -1.23471800 | 0.14197200  |
| H | 3.59905500  | -1.64194600 | 0.97347300  |
| H | 3.52499700  | -1.52861400 | -0.78146000 |
| C | -2.70256500 | -1.79759400 | -0.07364500 |
| H | -3.21222000 | -1.99840500 | 0.87662800  |
| H | -3.15979900 | -2.45311400 | -0.82382200 |
| C | 3.02305000  | 0.31790800  | 0.26561200  |
| H | 2.66435700  | 0.59715400  | 1.26378500  |
| H | 4.06204700  | 0.66080000  | 0.20225800  |
| C | -2.96637800 | -0.32298400 | -0.50023900 |
| H | -2.50500800 | -0.13818100 | -1.47780700 |
| H | -4.04514800 | -0.19232500 | -0.64298300 |
| C | 2.17284800  | 1.05865600  | -0.80430100 |
| H | 1.80668900  | 0.37069900  | -1.56835800 |
| H | 2.77115800  | 1.81210300  | -1.32416200 |
| C | -0.18061100 | 1.17917700  | -0.18798000 |
| C | -2.47102600 | 0.73691700  | 0.52253600  |
| H | -2.11686400 | 0.25467500  | 1.43763000  |
| H | -3.29573900 | 1.38943600  | 0.81350900  |
| N | -1.38961900 | 1.67104800  | 0.06524900  |
| N | 0.99217000  | 1.79665200  | -0.26116200 |
| C | 1.29000000  | 3.13842600  | 0.26366500  |
| H | 1.32355400  | 3.88361300  | -0.53819600 |
| H | 0.56171000  | 3.43182600  | 1.01804400  |
| H | 2.27288300  | 3.09826300  | 0.74012900  |
| C | -1.76618800 | 3.09020200  | -0.03420700 |
| H | -1.83857800 | 3.56309000  | 0.95112800  |
| H | -1.05542000 | 3.63219800  | -0.65613600 |
| H | -2.74476200 | 3.14191700  | -0.51862300 |
| H | -0.14787200 | 0.11009200  | -0.36330600 |

## 6

E = -851.73697  
ZPVE = 0.460071

|   |             |             |             |
|---|-------------|-------------|-------------|
| C | -2.87096100 | 0.62786300  | -1.23636400 |
| C | -2.87478700 | -0.76424500 | -1.15739600 |
| C | -2.75968100 | -1.41064700 | 0.08039600  |
| C | -2.87030100 | -0.62771100 | 1.23671000  |
| C | -2.87411600 | 0.76438000  | 1.15774200  |
| C | -2.75967600 | 1.41079000  | -0.08012700 |
| H | -2.85228800 | 1.10723300  | -2.21413800 |
| H | -2.87322100 | -1.35233400 | -2.07378400 |
| H | -2.85114300 | -1.10710700 | 2.21446100  |
| H | -2.87204200 | 1.35250500  | 2.07411000  |
| C | -2.27243100 | -2.83804200 | 0.17671800  |
| H | -2.78220600 | -3.37805500 | 0.98606700  |
| H | -2.48397200 | -3.38473500 | -0.75252500 |
| C | -2.27240100 | 2.83816700  | -0.17665600 |

|   |             |             |             |
|---|-------------|-------------|-------------|
| H | -2.48371900 | 3.38490800  | 0.75260900  |
| H | -2.78230700 | 3.37817100  | -0.98592400 |
| C | -0.74115200 | -2.86195300 | 0.46553200  |
| H | -0.56058900 | -2.29865700 | 1.38703500  |
| H | -0.43947100 | -3.90085700 | 0.65928100  |
| C | -0.74117700 | 2.86191400  | -0.46573600 |
| H | -0.56086700 | 2.29853300  | -1.38722500 |
| H | -0.43937900 | 3.90076400  | -0.65956900 |
| C | 0.13651300  | -2.25283900 | -0.66271500 |
| H | -0.50400600 | -1.82858200 | -1.43670100 |
| H | 0.72475800  | -3.04128900 | -1.14386700 |
| C | 0.44610900  | 0.00005000  | -0.00047400 |
| C | 0.13664000  | 2.25269900  | 0.66235100  |
| H | -0.50376600 | 1.82837900  | 1.43640700  |
| H | 0.72495900  | 3.04112700  | 1.14350500  |
| N | 1.07330100  | 1.17360200  | 0.24586500  |
| N | 1.07314800  | -1.17361000 | -0.24656600 |
| C | 2.49151100  | -1.59670700 | -0.04497800 |
| H | 2.97115200  | -0.79397800 | 0.51343300  |
| C | 2.49183000  | 1.59664400  | 0.04492500  |
| H | 2.97160400  | 0.79404900  | -0.51360100 |
| C | 2.59978100  | -2.84571100 | 0.84778800  |
| H | 2.06030000  | -2.70311700 | 1.79009600  |
| H | 2.20764100  | -3.74538600 | 0.36112800  |
| H | 3.65439100  | -3.03458800 | 1.08346200  |
| C | 3.24267300  | -1.79334800 | -1.37213000 |
| H | 4.29869100  | -2.03071100 | -1.18801400 |
| H | 2.81424700  | -2.61893600 | -1.95277000 |
| H | 3.19635200  | -0.89220600 | -1.99373700 |
| C | 2.60029000  | 2.84591300  | -0.84743800 |
| H | 2.20779100  | 3.74539000  | -0.36070000 |
| H | 3.65494600  | 3.03505700  | -1.08267900 |
| H | 2.06118400  | 2.70347800  | -1.78998000 |
| C | 3.24254200  | 1.79291200  | 1.37236300  |
| H | 4.29864800  | 2.03020300  | 1.18866700  |
| H | 2.81402100  | 2.61840100  | 1.95306700  |
| H | 3.19591400  | 0.89161700  | 1.99373100  |

## 6H<sup>+</sup>

E = -852.20722  
ZPVE = 0.476416

|   |             |             |             |
|---|-------------|-------------|-------------|
| C | -2.81992000 | 0.66838800  | -1.21952400 |
| C | -2.82532400 | -0.72823000 | -1.18298100 |
| C | -2.72364800 | -1.41661100 | 0.03667100  |
| C | -2.81991700 | -0.66840300 | 1.21952700  |
| C | -2.82532800 | 0.72821500  | 1.18298500  |
| C | -2.72365500 | 1.41659700  | -0.03666700 |
| H | -2.82505700 | 1.17783500  | -2.18125300 |
| H | -2.84985100 | -1.28691000 | -2.11656800 |
| H | -2.82505200 | -1.17785000 | 2.18125700  |
| H | -2.84986000 | 1.28689500  | 2.11657200  |
| C | -2.28876500 | -2.86279700 | 0.08265800  |
| H | -2.81545700 | -3.41410800 | 0.87043700  |
| H | -2.51588100 | -3.36741700 | -0.86441900 |
| C | -2.28878100 | 2.86278500  | -0.08265400 |

|   |             |             |             |
|---|-------------|-------------|-------------|
| H | -2.51589600 | 3.36740300  | 0.86442400  |
| H | -2.81547900 | 3.41409400  | -0.87043100 |
| C | -0.76111100 | -2.95201300 | 0.37377700  |
| H | -0.56362200 | -2.49999900 | 1.35228000  |
| H | -0.47980900 | -4.00793000 | 0.45973500  |
| C | -0.76112900 | 2.95201000  | -0.37377900 |
| H | -0.56364000 | 2.49999500  | -1.35228300 |
| H | -0.47983300 | 4.00792900  | -0.45974000 |
| C | 0.12846600  | -2.26742400 | -0.70173800 |
| H | -0.48837400 | -1.81063600 | -1.47770300 |
| H | 0.75337000  | -3.00450600 | -1.20649600 |
| C | 0.53368900  | 0.00000300  | -0.00000400 |
| C | 0.12845800  | 2.26742800  | 0.70173300  |
| H | -0.48837500 | 1.81063900  | 1.47770300  |
| H | 0.75336100  | 3.00451500  | 1.20648600  |
| N | 1.06460400  | 1.20357000  | 0.20986700  |
| N | 1.06460800  | -1.20356200 | -0.20987500 |
| C | 2.48461700  | -1.60802600 | 0.03302000  |
| H | 2.93957600  | -0.78733900 | 0.58554800  |
| C | 2.48460800  | 1.60804300  | -0.03303300 |
| H | 2.93956000  | 0.78737600  | -0.58559700 |
| C | 2.54763800  | -2.83997100 | 0.94790700  |
| H | 2.00674000  | -2.67346700 | 1.88465900  |
| H | 2.14998100  | -3.73983500 | 0.46855100  |
| H | 3.59600400  | -3.03854100 | 1.19347000  |
| C | 3.24969400  | -1.82552900 | -1.27974000 |
| H | 4.30229900  | -2.03220000 | -1.05955000 |
| H | 2.85914000  | -2.68223500 | -1.83908000 |
| H | 3.20381100  | -0.94823700 | -1.93392000 |
| C | 2.54761300  | 2.84002200  | -0.94787500 |
| H | 2.14995700  | 3.73986600  | -0.46848100 |
| H | 3.59597600  | 3.03860700  | -1.19344300 |
| H | 2.00670500  | 2.67355000  | -1.88462700 |
| C | 3.24970500  | 1.82549700  | 1.27972300  |
| H | 4.30230600  | 2.03217400  | 1.05952500  |
| H | 2.85916100  | 2.68218300  | 1.83910000  |
| H | 3.20383000  | 0.94818100  | 1.93387200  |
| H | -0.55155300 | 0.00000100  | -0.00000300 |

7

E = -930.33599

ZPVE = 0.516624

|   |            |             |             |
|---|------------|-------------|-------------|
| C | 3.13421500 | -0.86767200 | -1.08190300 |
| C | 3.13275700 | 0.51046000  | -1.29085700 |
| C | 3.02471700 | 1.39504800  | -0.21081400 |
| C | 3.13417900 | 0.86717200  | 1.08204100  |
| C | 3.13244400 | -0.51096000 | 1.29099400  |
| C | 3.02443700 | -1.39553000 | 0.21093200  |
| H | 3.11637000 | -1.53818100 | -1.93994600 |
| H | 3.11631000 | 1.53768400  | 1.94008100  |
| C | 2.54398500 | 2.81302300  | -0.40524300 |
| H | 3.10576000 | 3.51504400  | 0.22625300  |
| H | 2.69244300 | 3.13386600  | -1.44538900 |
| C | 2.54339000 | -2.81340700 | 0.40527600  |
| H | 2.69161000 | -3.13428100 | 1.44544700  |

|   |             |             |             |
|---|-------------|-------------|-------------|
| H | 3.10511900  | -3.51554600 | -0.22613000 |
| C | 1.03869400  | 2.92525500  | -0.02547000 |
| H | 0.92402400  | 2.57027000  | 1.00426700  |
| H | 0.76725800  | 3.98881000  | -0.03202100 |
| C | 1.03813800  | -2.92530300 | 0.02525700  |
| H | 0.92366000  | -2.57000600 | -1.00439400 |
| H | 0.76651200  | -3.98881400 | 0.03146500  |
| C | 0.06992900  | 2.12027700  | -0.94164000 |
| H | 0.65511300  | 1.49575900  | -1.61469700 |
| H | -0.49987000 | 2.80216300  | -1.58181100 |
| C | -0.28729500 | -0.00002300 | -0.00010200 |
| C | 0.06938200  | -2.12041800 | 0.94150400  |
| H | 0.65451800  | -1.49618700 | 1.61487000  |
| H | -0.50065000 | -2.80241600 | 1.58134700  |
| N | -0.90601300 | -1.19556500 | 0.28144600  |
| N | -0.90572000 | 1.19568800  | -0.28155800 |
| C | -2.17277500 | 1.84332700  | 0.28881000  |
| C | -2.17320900 | -1.84295800 | -0.28880400 |
| C | -1.99518300 | 3.37427300  | 0.45460500  |
| H | -1.12975800 | 3.62936400  | 1.06820600  |
| H | -1.92655500 | 3.90795700  | -0.49815400 |
| H | -2.88316900 | 3.75400700  | 0.97282400  |
| C | -3.41367900 | 1.68459800  | -0.61801300 |
| H | -4.23820800 | 2.28957400  | -0.21913400 |
| H | -3.19249800 | 2.05036800  | -1.62809200 |
| H | -3.77559500 | 0.66336400  | -0.70447200 |
| C | -1.99569600 | -3.37389800 | -0.45474400 |
| H | -1.92622300 | -3.90757100 | 0.49795900  |
| H | -2.88410000 | -3.75368700 | -0.97220600 |
| H | -1.13075800 | -3.62893800 | -1.06906800 |
| C | -3.41396500 | -1.68418000 | 0.61822100  |
| H | -4.23858800 | -2.28912500 | 0.21948600  |
| H | -3.19262800 | -2.04994900 | 1.62826500  |
| H | -3.77582000 | -0.66292600 | 0.70473700  |
| C | -2.39403500 | -1.31113000 | -1.72281300 |
| H | -2.28824600 | -0.23248300 | -1.80350300 |
| H | -1.65367200 | -1.75741500 | -2.39641500 |
| H | -3.39171800 | -1.59182300 | -2.08262100 |
| C | -2.39349700 | 1.31162500  | 1.72288200  |
| H | -3.39110400 | 1.59246900  | 2.08278500  |
| H | -2.28784500 | 0.23296600  | 1.80362800  |
| H | -1.65299800 | 1.75785800  | 2.39636800  |
| H | 3.12064000  | -0.89961700 | 2.30802000  |
| H | 3.12120000  | 0.89911900  | -2.30788500 |

7H<sup>+</sup>

E = -930.81394

ZPVE = 0.533174

|   |             |             |             |
|---|-------------|-------------|-------------|
| C | -3.03159700 | -0.97038500 | 0.99473900  |
| C | -3.02691600 | 0.38335300  | 1.33660900  |
| C | -2.93439200 | 1.37231800  | 0.34599300  |
| C | -3.03161600 | 0.97037100  | -0.99473200 |
| C | -3.02692900 | -0.38336600 | -1.33660300 |
| C | -2.93438600 | -1.37233100 | -0.34598700 |
| H | -3.04018900 | -1.71943000 | 1.78429000  |

|   |             |             |             |   |             |             |             |
|---|-------------|-------------|-------------|---|-------------|-------------|-------------|
| H | -3.04022200 | 1.71941600  | -1.78428300 | C | 2.85599800  | 0.79406500  | 1.11560500  |
| C | -2.51581500 | 2.78361900  | 0.68303900  | C | 2.85838100  | -0.59372600 | 1.28276100  |
| H | -3.13164400 | 3.52120900  | 0.15404000  | C | 2.74443700  | -1.40358700 | 0.13846400  |
| H | -2.63805500 | 2.97958400  | 1.75529000  | C | 2.85637600  | -0.79502300 | -1.11517400 |
| C | -2.51580500 | -2.78362900 | -0.68303900 | C | 2.85928300  | 0.59275300  | -1.28233200 |
| H | -2.63805300 | -2.97959500 | -1.75528800 | C | 2.74496100  | 1.40264900  | -0.13809200 |
| H | -3.13162600 | -3.52122200 | -0.15403400 | H | 2.82302100  | 1.42629800  | 2.00387500  |
| C | -1.03806200 | 3.01071900  | 0.25897200  | H | 2.82379100  | -1.42726800 | -2.00345000 |
| H | -0.96645400 | 2.82280400  | -0.81598400 | C | 2.26704300  | -2.83859500 | 0.20376900  |
| H | -0.78558200 | 4.06657200  | 0.40738100  | H | 2.83861600  | -3.46999400 | -0.49075800 |
| C | -1.03804700 | -3.01072400 | -0.25898200 | H | 2.40324600  | -3.27101600 | 1.20148200  |
| H | -0.96643600 | -2.82282200 | 0.81597600  | C | 2.26813600  | 2.83783200  | -0.20374200 |
| H | -0.78556200 | -4.06657400 | -0.40740400 | H | 2.40473400  | 3.26991700  | -1.20153700 |
| C | -0.00383400 | 2.12443000  | 1.01413100  | H | 2.83977400  | 3.46916400  | 0.49079100  |
| H | -0.51556700 | 1.48187500  | 1.73307600  | C | 0.76641800  | -2.92242700 | -0.19576500 |
| H | 0.67404600  | 2.74206300  | 1.60744400  | H | 0.66101800  | -2.48426500 | -1.19381600 |
| C | 0.36040700  | 0.00000100  | 0.00000500  | H | 0.49692800  | -3.98380400 | -0.27894700 |
| C | -0.00382800 | -2.12442100 | -1.01413500 | C | 0.76743800  | 2.92229200  | 0.19536800  |
| H | -0.51556900 | -1.48185900 | -1.73306700 | H | 0.66158800  | 2.48441800  | 1.19349800  |
| H | 0.67405100  | -2.74204100 | -1.60746200 | H | 0.49830300  | 3.98378400  | 0.27821500  |
| N | 0.88469900  | -1.22063900 | -0.19873200 | C | -0.21122000 | -2.19245200 | 0.77389900  |
| N | 0.88469300  | 1.22064500  | 0.19873200  | H | 0.36592900  | -1.63721000 | 1.50984100  |
| C | 2.12666300  | 1.84047600  | -0.46893600 | H | -0.79642200 | -2.92382500 | 1.34183500  |
| C | 2.12667200  | -1.84046900 | 0.46893600  | C | -0.54581600 | 0.00002100  | -0.00041200 |
| C | 1.84153600  | 3.33141800  | -0.76750600 | C | -0.21016400 | 2.19243500  | -0.77442700 |
| H | 0.97385500  | 3.47065800  | -1.41411400 | H | 0.36703300  | 1.63685500  | -1.51007500 |
| H | 1.72162400  | 3.93969300  | 0.13262500  | H | -0.79495700 | 2.92387900  | -1.34268600 |
| H | 2.71133400  | 3.72395500  | -1.30241900 | N | -1.17171600 | 1.21305700  | -0.17657400 |
| C | 3.37112000  | 1.80516200  | 0.43823500  | N | -1.17230500 | -1.21268200 | 0.17595500  |
| H | 4.14786300  | 2.43773700  | -0.00328500 | C | -2.43011900 | -1.80160000 | -0.46995600 |
| H | 3.14562500  | 2.21164400  | 1.43072300  | C | -2.42905300 | 1.80245900  | 0.46987400  |
| H | 3.79876300  | 0.81201900  | 0.56344300  | C | -2.23720200 | -3.30371900 | -0.79984600 |
| C | 1.84155200  | -3.33141300 | 0.76749900  | H | -1.37097100 | -3.47996700 | -1.43943600 |
| H | 1.72164200  | -3.93968500 | -0.13263400 | H | -2.15580200 | -3.93535700 | 0.08997000  |
| H | 2.71135400  | -3.72394700 | 1.30240800  | H | -3.12301100 | -3.63728700 | -1.35248000 |
| H | 0.97387400  | -3.47066000 | 1.41410900  | C | -3.67946200 | -1.75036300 | 0.43907400  |
| C | 3.37113100  | -1.80514800 | -0.43823500 | H | -4.49396300 | -2.32219500 | -0.02441000 |
| H | 4.14787200  | -2.43772900 | 0.00327900  | H | -3.46074300 | -2.21181300 | 1.40975200  |
| H | 3.14563500  | -2.21161900 | -1.43072700 | H | -4.05519900 | -0.74646500 | 0.62303000  |
| H | 3.79877500  | -0.81200500 | -0.56343300 | C | -2.23571300 | 3.30464200  | 0.79919800  |
| C | 2.34611200  | -1.16690300 | 1.83493000  | H | -2.15345100 | 3.93581700  | -0.09086100 |
| H | 2.44163800  | -0.08541600 | 1.78514800  | H | -3.12174600 | 3.63886100  | 1.35107100  |
| H | 1.51766600  | -1.40316500 | 2.51174800  | H | -1.36983900 | 3.48084700  | 1.43928600  |
| H | 3.26484000  | -1.56008600 | 2.28148500  | C | -3.67899400 | 1.75112400  | -0.43830500 |
| C | 2.34610200  | 1.16690700  | -1.83493000 | H | -4.49336400 | 2.32250500  | 0.02596600  |
| H | 3.26484500  | 1.56007000  | -2.28147300 | H | -3.46111400 | 2.21301200  | -1.40896500 |
| H | 2.44160100  | 0.08541800  | -1.78515000 | H | -4.05449500 | 0.74717600  | -0.62237700 |
| H | 1.51766900  | 1.40319200  | -2.51175600 | C | -2.65070900 | 1.12131200  | 1.83877100  |
| H | -3.03857800 | -0.67137400 | -2.38596600 | H | -2.57075000 | 0.03877000  | 1.79734300  |
| H | -3.03855500 | 0.67136100  | 2.38597300  | H | -1.89542600 | 1.47199700  | 2.55143600  |
| H | -0.72863000 | 0.00000000  | 0.00001000  | H | -3.63928900 | 1.38450800  | 2.23505900  |
|   |             |             |             | C | -2.65249100 | -1.12003700 | -1.83856800 |
|   |             |             |             | H | -3.64231400 | -1.38096000 | -2.23325100 |
|   |             |             |             | H | -2.56993800 | -0.03767900 | -1.79732200 |
|   |             |             |             | H | -1.89920900 | -1.47249200 | -2.55248200 |

8

E = -1041.08109

ZPVE = 0.550514



|   |            |             |             |
|---|------------|-------------|-------------|
| N | 2.80826900 | 1.15535200  | -2.58743800 |
| H | 3.40989400 | 1.96506000  | -2.70477600 |
| H | 3.03097100 | 0.47501500  | -3.30717900 |
| N | 2.80647100 | -1.15618600 | 2.58785900  |
| H | 3.40645700 | -1.96710300 | 2.70514700  |
| H | 3.03050500 | -0.47630000 | 3.30760500  |

### 8H<sup>+</sup>

E = -1041.56785

ZPVE = 0.567519

|   |             |             |             |
|---|-------------|-------------|-------------|
| C | 2.77674900  | -0.87025500 | -1.06093300 |
| C | 2.78171300  | 0.50599200  | -1.32657400 |
| C | 2.68352300  | 1.39319700  | -0.23418000 |
| C | 2.77677100  | 0.87006600  | 1.06093300  |
| C | 2.78166200  | -0.50617800 | 1.32657300  |
| C | 2.68345300  | -1.39337900 | 0.23417700  |
| H | 2.76619300  | -1.56315600 | -1.90218400 |
| H | 2.76623500  | 1.56297000  | 1.90218200  |
| C | 2.26488000  | 2.83899900  | -0.40045900 |
| H | 2.86875000  | 3.49739200  | 0.23605000  |
| H | 2.39983400  | 3.19177000  | -1.42733500 |
| C | 2.26474300  | -2.83916200 | 0.40045500  |
| H | 2.39966000  | -3.19192300 | 1.42733800  |
| H | 2.86859900  | -3.49759100 | -0.23603400 |
| C | 0.77911800  | 3.00802900  | 0.01664900  |
| H | 0.69144200  | 2.70450400  | 1.06403500  |
| H | 0.51703500  | 4.07135700  | -0.02403000 |
| C | 0.77898200  | -3.00813100 | -0.01667700 |
| H | 0.69134900  | -2.70468000 | -1.06408800 |
| H | 0.51683500  | -4.07144000 | 0.02407600  |
| C | -0.22541200 | 2.18763100  | -0.84478000 |
| H | 0.31172100  | 1.60227400  | -1.59277900 |
| H | -0.88236200 | 2.85030800  | -1.41242300 |
| C | -0.62080900 | -0.00001500 | -0.00013700 |
| C | -0.22551400 | -2.18760400 | 0.84467000  |
| H | 0.31166900  | -1.60218200 | 1.59258300  |
| H | -0.88246900 | -2.85018100 | 1.41242000  |
| N | -1.14050400 | -1.23275300 | 0.12056500  |
| N | -1.14043700 | 1.23276300  | -0.12074800 |
| C | -2.39008700 | 1.80989400  | 0.56787000  |
| C | -2.39036500 | -1.80974900 | -0.56781800 |
| C | -2.12676800 | 3.28879000  | 0.93938100  |
| H | -1.26648100 | 3.40988500  | 1.59895600  |
| H | -2.00839500 | 3.93947800  | 0.06913000  |
| H | -3.00627400 | 3.64363200  | 1.48476200  |
| C | -3.62852000 | 1.81084900  | -0.34895800 |
| H | -4.41578100 | 2.40879000  | 0.12146300  |
| H | -3.39881200 | 2.27544900  | -1.31459000 |
| H | -4.04402000 | 0.82269100  | -0.53570600 |
| C | -2.12737600 | -3.28865500 | -0.93953500 |
| H | -2.00915300 | -3.93950500 | -0.06939000 |
| H | -3.00696700 | -3.64321900 | -1.48496000 |
| H | -1.26712800 | -3.40985000 | -1.59914200 |
| C | -3.62860000 | -1.81058400 | 0.34928000  |
| H | -4.41609600 | -2.40827300 | -0.12106700 |

|   |             |             |             |
|---|-------------|-------------|-------------|
| H | -3.39878200 | -2.27539100 | 1.31478600  |
| H | -4.04384000 | -0.82236300 | 0.53628500  |
| C | -2.60949900 | -1.06971100 | -1.89970500 |
| H | -2.67575700 | 0.01063700  | -1.80090700 |
| H | -1.79325600 | -1.29427200 | -2.59484200 |
| H | -3.54213500 | -1.41963200 | -2.35352600 |
| C | -2.60901500 | 1.06998200  | 1.89986400  |
| H | -3.54150000 | 1.42006200  | 2.35387200  |
| H | -2.67544100 | -0.01036300 | 1.80116100  |
| H | -1.79258300 | 1.29448600  | 2.59479800  |
| N | 2.71815800  | -0.97526600 | 2.65883200  |
| H | 3.28350900  | -1.79880100 | 2.84043000  |
| H | 2.94799700  | -0.26117000 | 3.34275700  |
| N | 2.71825900  | 0.97507200  | -2.65883500 |
| H | 3.28359200  | 1.79862300  | -2.84041400 |
| H | 2.94813200  | 0.26098100  | -3.34275100 |
| H | 0.46857800  | -0.00005100 | -0.00019200 |

### 9

E = -1151.81958

ZPVE = 0.584241

|   |             |             |             |
|---|-------------|-------------|-------------|
| C | -2.67863800 | -0.96706200 | 1.00916100  |
| C | -2.62488500 | 0.39887900  | 1.34131300  |
| C | -2.53436500 | 1.37121600  | 0.33114400  |
| C | -2.67930500 | 0.96683400  | -1.00877200 |
| C | -2.62534000 | -0.39910400 | -1.34099200 |
| C | -2.53416300 | -1.37136700 | -0.33083500 |
| C | -2.03274000 | 2.76521400  | 0.64564000  |
| H | -2.62397300 | 3.54442300  | 0.14017800  |
| H | -2.11986000 | 2.97240600  | 1.71582000  |
| C | -2.03255500 | -2.76530200 | -0.64561000 |
| H | -2.11985000 | -2.97222500 | -1.71581900 |
| H | -2.62373500 | -3.54453800 | -0.14014700 |
| C | -0.54445200 | 2.90778600  | 0.21268400  |
| H | -0.45495500 | 2.60163900  | -0.83463200 |
| H | -0.27450500 | 3.97128200  | 0.26434900  |
| C | -0.54419600 | -2.90789500 | -0.21288200 |
| H | -0.45443700 | -2.60181900 | 0.83444100  |
| H | -0.27424400 | -3.97138200 | -0.26468400 |
| C | 0.44275400  | 2.06028600  | 1.06921000  |
| H | -0.13071800 | 1.40683200  | 1.72223000  |
| H | 1.02345300  | 2.71099500  | 1.73231300  |
| C | 0.78512600  | 0.00007600  | -0.00028000 |
| C | 0.44290400  | -2.06030600 | -1.06945400 |
| H | -0.13066300 | -1.40693800 | -1.72246100 |
| H | 1.02367600  | -2.71096600 | -1.73253600 |
| N | 1.40880300  | -1.17665200 | -0.34310300 |
| N | 1.40879300  | 1.17676400  | 0.34289800  |
| C | 2.66447200  | 1.85199600  | -0.21205500 |
| C | 2.66457600  | -1.85178200 | 0.21189100  |
| C | 2.46951400  | 3.38591500  | -0.32199900 |
| H | 1.59636400  | 3.64975200  | -0.92097500 |
| H | 2.39790100  | 3.88400200  | 0.64969800  |
| H | 3.34982300  | 3.79530500  | -0.83087800 |
| C | 3.91356800  | 1.67069700  | 0.67966900  |

|   |             |             |             |
|---|-------------|-------------|-------------|
| H | 4.73113200  | 2.29640500  | 0.29816800  |
| H | 3.69658800  | 1.99614000  | 1.70440400  |
| H | 4.28319500  | 0.64909600  | 0.72544700  |
| C | 2.46979500  | -3.38572000 | 0.32181800  |
| H | 2.39831900  | -3.88382100 | -0.64988000 |
| H | 3.35012100  | -3.79499400 | 0.83076200  |
| H | 1.59664900  | -3.64968200 | 0.92074300  |
| C | 3.91364600  | -1.67036100 | -0.67982700 |
| H | 4.73124200  | -2.29604600 | -0.29835500 |
| H | 3.69668500  | -1.99576300 | -1.70458000 |
| H | 4.28321900  | -0.64874100 | -0.72554500 |
| C | 2.88350900  | -1.37605800 | 1.66583100  |
| H | 2.80079900  | -0.29915500 | 1.78491100  |
| H | 2.12688700  | -1.82883400 | 2.31648100  |
| H | 3.87198000  | -1.69204100 | 2.02234100  |
| C | 2.88348200  | 1.37629000  | -1.66599400 |
| H | 3.87195500  | 1.69231000  | -2.02246500 |
| H | 2.80082400  | 0.29938200  | -1.78509400 |
| H | 2.12686800  | 1.82904400  | -2.31666900 |
| N | -2.50591700 | -0.78506300 | -2.70822600 |
| H | -3.28318600 | -1.33132600 | -3.06788600 |
| H | -2.31820100 | 0.00408200  | -3.31759000 |
| N | -2.50495400 | 0.78468800  | 2.70840000  |
| H | -3.28043600 | 1.33379600  | 3.06750000  |
| H | -2.32012000 | -0.00495200 | 3.31798600  |
| N | -2.69413800 | -1.90915400 | 2.08544200  |
| H | -3.47585000 | -1.74100700 | 2.71662400  |
| H | -2.76488600 | -2.86691900 | 1.75920000  |
| N | -2.69540500 | 1.90907800  | -2.08470600 |
| H | -3.47501200 | 1.73864600  | -2.71781800 |
| H | -2.76956900 | 2.86659100  | -1.75848500 |

### 9H<sup>+</sup>

E = -1152.31134

ZPVE = 0.600951

|   |             |             |             |
|---|-------------|-------------|-------------|
| C | 2.59849200  | 1.06957300  | 0.90903600  |
| C | 2.52669500  | -0.25783800 | 1.38156800  |
| C | 2.45797900  | -1.32948900 | 0.47002000  |
| C | 2.59851000  | -1.06958900 | -0.90902400 |
| C | 2.52669500  | 0.25781600  | -1.38155600 |
| C | 2.45796800  | 1.32946700  | -0.47000400 |
| C | 2.02482900  | -2.70600900 | 0.93033800  |
| H | 2.66054600  | -3.50315800 | 0.52106300  |
| H | 2.10051700  | -2.79796400 | 2.01616200  |
| C | 2.02484400  | 2.70598600  | -0.93033800 |
| H | 2.10056100  | 2.79791700  | -2.01616100 |
| H | 2.66056200  | 3.50312900  | -0.52105100 |
| C | 0.55931100  | -2.97201800 | 0.49002600  |
| H | 0.49959600  | -2.85199600 | -0.59522000 |
| H | 0.30467500  | -4.01635000 | 0.70543800  |
| C | 0.55931600  | 2.97202400  | -0.49007200 |
| H | 0.49955400  | 2.85203400  | 0.59517600  |
| H | 0.30470300  | 4.01635400  | -0.70552300 |
| C | -0.47099900 | -2.03277300 | 1.18039700  |
| H | 0.04570400  | -1.34037400 | 1.84678100  |

|   |             |             |             |
|---|-------------|-------------|-------------|
| H | -1.14772200 | -2.60278000 | 1.82160500  |
| C | -0.83287200 | -0.00000400 | -0.00003500 |
| C | -0.47099300 | 2.03278000  | -1.18044400 |
| H | 0.04570600  | 1.34039300  | -1.84684400 |
| H | -1.14772600 | 2.60279300  | -1.82163600 |
| N | -1.36045200 | 1.19892700  | -0.29526000 |
| N | -1.36046900 | -1.19892200 | 0.29521800  |
| C | -2.59536300 | -1.86824400 | -0.32838300 |
| C | -2.59531300 | 1.86826400  | 0.32839900  |
| C | -2.30742200 | -3.37752200 | -0.51174600 |
| H | -1.43728400 | -3.56248900 | -1.14350400 |
| H | -2.18831500 | -3.91335500 | 0.43324800  |
| H | -3.17520500 | -3.81149200 | -1.01738600 |
| C | -3.84403900 | -1.76627900 | 0.56783000  |
| H | -4.62161600 | -2.42585100 | 0.16908900  |
| H | -3.62255200 | -2.10169400 | 1.58747200  |
| H | -4.26761900 | -0.76506500 | 0.62068700  |
| C | -2.30737400 | 3.37755300  | 0.51166800  |
| H | -2.18807800 | 3.91329200  | -0.43335500 |
| H | -3.17524300 | 3.81159200  | 1.01710200  |
| H | -1.43735100 | 3.56256600  | 1.14357100  |
| C | -3.84405600 | 1.76623700  | -0.56771800 |
| H | -4.62151700 | 2.42602700  | -0.16911400 |
| H | -3.62257700 | 2.10134400  | -1.58746200 |
| H | -4.26778100 | 0.76506800  | -0.62027700 |
| C | -2.81194900 | 1.30380600  | 1.74401100  |
| H | -2.91739500 | 0.22257900  | 1.77975500  |
| H | -1.97567500 | 1.58303900  | 2.39419100  |
| H | -3.72384700 | 1.73936900  | 2.16495700  |
| C | -2.81211500 | -1.30372700 | -1.74395400 |
| H | -3.72410500 | -1.73918900 | -2.16480400 |
| H | -2.91745800 | -0.22248900 | -1.77965800 |
| H | -1.97594400 | -1.58302300 | -2.39424100 |
| N | 2.38020200  | 0.50646900  | -2.77138100 |
| H | 3.08865400  | 1.10372800  | -3.18675300 |
| H | 2.25410000  | -0.33009400 | -3.32889700 |
| N | 2.38019000  | -0.50646400 | 2.77138100  |
| H | 3.08843000  | -1.10399300 | 3.18671700  |
| H | 2.25436000  | 0.33012000  | 3.32892200  |
| N | 2.62669200  | 2.12051100  | 1.86532700  |
| H | 3.31857200  | 1.95885200  | 2.59439000  |
| H | 2.82472400  | 3.02656600  | 1.45448300  |
| N | 2.62671500  | -2.12054200 | -1.86528100 |
| H | 3.31835500  | -1.95875400 | -2.59453700 |
| H | 2.82502300  | -3.02655100 | -1.45446600 |
| H | 0.25765700  | -0.00002000 | -0.00006800 |

**B3LYP/6-311+G\*\*//HF/6-31G\* SCF energies in gas phase (E), HF/6-31G\* zero point vibrational energies (ZPVE) and Cartesian coordinates for 10 and their corresponding mono- and bis-protonated cations (All energies are given in Hartree).**

### 10

E = -1156.56536

ZPVE = 0.637618

|   |             |             |             |
|---|-------------|-------------|-------------|
| C | -0.32438700 | -1.16874900 | 1.22956700  |
| C | 0.00004900  | -0.00002700 | 1.89263600  |
| C | 0.32446500  | 1.16870900  | 1.22958300  |
| C | 0.11710800  | 1.20696400  | -0.14911800 |
| C | -0.00003200 | 0.00001300  | -0.81739400 |
| C | -0.11711400 | -1.20696100 | -0.14914700 |
| H | 0.00008100  | -0.00004300 | 2.97026100  |
| H | -0.00007500 | 0.00003100  | -1.89524900 |
| C | 0.98699500  | 2.28562200  | 2.00030400  |
| H | 0.53147900  | 3.25403000  | 1.81506200  |
| H | 0.87309200  | 2.09477200  | 3.06322800  |
| C | 0.09932400  | -2.51196900 | -0.87428100 |
| H | -0.03394600 | -2.37733700 | -1.94482400 |
| H | -0.63001200 | -3.25515700 | -0.56907300 |
| C | 2.49489600  | 2.38362700  | 1.66453500  |
| H | 2.59646100  | 2.84141100  | 0.68737300  |
| H | 2.94627800  | 3.07906600  | 2.36903700  |
| C | 1.50876600  | -3.09111300 | -0.59683000 |
| H | 1.74822900  | -2.99829200 | 0.45300000  |
| H | 1.46976500  | -4.15523500 | -0.82512500 |
| C | 3.29574900  | 1.05248000  | 1.68235400  |
| H | 2.76045900  | 0.28357800  | 2.21332000  |
| H | 4.23326500  | 1.22023600  | 2.20881300  |
| C | 3.07902300  | -0.68792700 | 0.04938700  |
| C | 2.66643100  | -2.56124900 | -1.44728600 |
| H | 2.32151200  | -2.50975200 | -2.47776900 |
| H | 3.45026500  | -3.31745500 | -1.43343000 |
| N | 3.30002700  | -1.26823900 | -1.13941400 |
| N | 3.60879800  | 0.51253000  | 0.35513100  |
| C | 4.53724800  | 1.36077500  | -0.39060600 |
| H | 5.53906500  | 0.94491900  | -0.41418200 |
| H | 4.20442700  | 1.54572700  | -1.40111200 |
| H | 4.60844000  | 2.31996600  | 0.10107000  |
| C | 4.17096300  | -0.87337500 | -2.24706900 |
| H | 3.69198500  | -0.15774800 | -2.90900600 |
| H | 5.10766600  | -0.46992600 | -1.90541800 |
| H | 4.40733800  | -1.75237000 | -2.83277700 |
| C | -0.98685900 | -2.28569400 | 2.00028900  |
| H | -0.53125800 | -3.25406700 | 1.81508200  |
| H | -0.87302200 | -2.09481700 | 3.06321600  |
| C | -2.49472900 | -2.38383900 | 1.66442800  |
| H | -2.59616800 | -2.84163000 | 0.68726000  |
| H | -2.94608800 | -3.07932900 | 2.36889300  |
| C | -3.29572300 | -1.05277200 | 1.68221500  |
| H | -2.76056600 | -0.28386200 | 2.21330400  |
| H | -4.23328900 | -1.22064600 | 2.20854900  |
| N | -3.60865400 | -0.51272000 | 0.35500100  |
| C | -3.07888000 | 0.68777900  | 0.04942000  |
| C | -4.53709000 | -1.36085600 | -0.39087500 |
| N | -3.30007600 | 1.26834400  | -1.13922400 |
| H | -5.53892700 | -0.94503400 | -0.41434100 |
| H | -4.20428300 | -1.54557500 | -1.40142500 |
| H | -4.60823700 | -2.32015600 | 0.10059100  |
| C | -2.66655500 | 2.56143200  | -1.44692000 |

|   |             |            |             |
|---|-------------|------------|-------------|
| C | -4.17141400 | 0.87388800 | -2.24670400 |
| C | -1.50877700 | 3.09116000 | -0.59653500 |
| H | -2.32180400 | 2.51015200 | -2.47747000 |
| H | -3.45040100 | 3.31762000 | -1.43278200 |
| H | -3.69262000 | 0.15864000 | -2.90918800 |
| H | -5.10791500 | 0.47015300 | -1.90484700 |
| H | -4.40815600 | 1.75313400 | -2.83189200 |
| C | -0.09938500 | 2.51199900 | -0.87418700 |
| H | -1.74813300 | 2.99823600 | 0.45331000  |
| H | -1.46976800 | 4.15530600 | -0.82471900 |
| H | 0.03374400  | 2.37739300 | -1.94475100 |
| H | 0.63000800  | 3.25516000 | -0.56905000 |

**10-H<sup>+</sup>**

E = -1157.03981

ZPVE = 0.654650

|   |             |             |             |
|---|-------------|-------------|-------------|
| C | -0.10904900 | -1.01259000 | 0.94159700  |
| C | 0.15448700  | 0.24091500  | 1.47736100  |
| C | 0.15878900  | 1.40300200  | 0.71923400  |
| C | -0.30614600 | 1.32255500  | -0.59703600 |
| C | -0.37423300 | 0.06148600  | -1.17291400 |
| C | -0.19458500 | -1.11191000 | -0.44979700 |
| H | 0.33470400  | 0.31844300  | 2.53627800  |
| H | -0.60906900 | -0.01187000 | -2.22144800 |
| C | 0.76057000  | 2.66717400  | 1.28935900  |
| H | 0.22690200  | 3.55326600  | 0.97293100  |
| H | 0.71386600  | 2.65154600  | 2.37361000  |
| C | -0.00036800 | -2.41757000 | -1.18789000 |
| H | -0.38901500 | -2.33073400 | -2.19762400 |
| H | -0.53547600 | -3.23568200 | -0.72161600 |
| C | 2.23794800  | 2.80607200  | 0.84538200  |
| H | 2.29433300  | 2.82773700  | -0.23790400 |
| H | 2.61229000  | 3.76515700  | 1.18672800  |
| C | 1.49785400  | -2.80303400 | -1.25628700 |
| H | 1.85263300  | -3.03033500 | -0.25669200 |
| H | 1.59007900  | -3.71833200 | -1.83125000 |
| C | 3.17004900  | 1.70103300  | 1.40032900  |
| H | 2.64987400  | 1.08493000  | 2.11817100  |
| H | 3.99493100  | 2.15368500  | 1.92776600  |
| C | 3.05848400  | -0.01680200 | -0.30250900 |
| C | 2.41033400  | -1.72222400 | -1.88529700 |
| H | 1.83135900  | -0.92592400 | -2.32459900 |
| H | 3.00830500  | -2.14406600 | -2.68119700 |
| N | 3.38324000  | -1.10972900 | -0.94497100 |
| N | 3.81052900  | 0.79042100  | 0.40841400  |
| C | 5.27103400  | 0.86390500  | 0.32890000  |
| H | 5.74631400  | 0.36466000  | 1.16357300  |
| H | 5.62157600  | 0.44423300  | -0.59875400 |
| H | 5.54787000  | 1.90814200  | 0.34477100  |
| C | 4.60151300  | -1.89290300 | -0.73018300 |
| H | 5.33704800  | -1.69994600 | -1.50022200 |
| H | 5.02109400  | -1.69278500 | 0.24131100  |
| H | 4.33049400  | -2.93800600 | -0.76698600 |
| C | -0.41743900 | -2.15909500 | 1.87884200  |
| H | 0.10948500  | -3.06892300 | 1.60723400  |

|   |             |             |             |
|---|-------------|-------------|-------------|
| H | -0.07360500 | -1.89516300 | 2.87370700  |
| C | -1.93447300 | -2.47414200 | 1.94601100  |
| H | -2.21831800 | -3.04951100 | 1.07148900  |
| H | -2.08165900 | -3.13493700 | 2.79538600  |
| C | -2.89393700 | -1.26567500 | 2.07999500  |
| H | -2.40100800 | -0.42012600 | 2.53328000  |
| H | -3.71067900 | -1.55410300 | 2.73604100  |
| N | -3.45041600 | -0.81086400 | 0.80777000  |
| C | -3.21311800 | 0.47305400  | 0.46014500  |
| C | -4.47114200 | -1.70522600 | 0.26590500  |
| N | -3.52574800 | 0.87465500  | -0.78405300 |
| H | -5.21913100 | -1.14532500 | -0.27176600 |
| H | -4.07518800 | -2.47666600 | -0.38681900 |
| H | -4.97073900 | -2.20002500 | 1.09030500  |
| C | -3.45225600 | 2.31668600  | -1.04671900 |
| C | -3.81542300 | 0.06220500  | -1.96130900 |
| C | -2.15148600 | 3.04544300  | -0.68660600 |
| H | -3.65125500 | 2.46256400  | -2.10195500 |
| H | -4.25551500 | 2.81721600  | -0.51735300 |
| H | -3.44304100 | -0.93990300 | -1.83071000 |
| H | -4.87343200 | 0.01885800  | -2.20101400 |
| H | -3.30437500 | 0.48785000  | -2.81671500 |
| C | -0.83751700 | 2.53607100  | -1.33047200 |
| H | -2.04430600 | 3.05165900  | 0.38937100  |
| H | -2.29995900 | 4.07756900  | -0.99571000 |
| H | -1.00171000 | 2.29349100  | -2.37608300 |
| H | -0.11590700 | 3.34724300  | -1.31923500 |
| H | 2.02767100  | 0.26215000  | -0.37265600 |

**10-(H<sup>+</sup>)<sub>2</sub>**

E = -1157.42030

ZPVE = 0.670458

|   |             |             |             |
|---|-------------|-------------|-------------|
| C | 0.01625400  | -1.22481800 | -0.54388500 |
| C | -0.00001500 | -0.00001100 | -1.20606000 |
| C | -0.01627400 | 1.22480000  | -0.54393600 |
| C | 0.17951100  | 1.21183600  | 0.84364700  |
| C | 0.00006900  | 0.00002800  | 1.50476100  |
| C | -0.17944000 | -1.21181800 | 0.84369300  |
| H | -0.00006000 | -0.00003700 | -2.28297700 |
| H | 0.00012300  | 0.00004300  | 2.58188800  |
| C | -0.38776500 | 2.48428500  | -1.29696700 |
| H | 0.17680100  | 3.34311900  | -0.95747200 |
| H | -0.16887900 | 2.37107000  | -2.35354500 |
| C | -0.68626200 | -2.41215200 | 1.61564200  |
| H | -0.50205600 | -2.27041700 | 2.67509500  |
| H | -0.17661900 | -3.32622700 | 1.33724400  |
| C | -1.89695300 | 2.79445700  | -1.11614000 |
| H | -2.12626300 | 2.89181300  | -0.06045400 |
| H | -2.09513600 | 3.76432100  | -1.55701800 |
| C | -2.20567600 | -2.61810100 | 1.38639000  |
| H | -2.38236300 | -2.85730500 | 0.34316800  |
| H | -2.51239400 | -3.48739700 | 1.95633000  |
| C | -2.84731700 | 1.76011600  | -1.77228800 |
| H | -2.29095500 | 1.02149900  | -2.33078600 |
| H | -3.48429900 | 2.25791800  | -2.48566500 |

|   |             |             |             |
|---|-------------|-------------|-------------|
| C | -3.27967600 | 0.19910700  | 0.01274900  |
| C | -3.09149700 | -1.41247700 | 1.79190700  |
| H | -2.51392900 | -0.64205700 | 2.27836700  |
| H | -3.84381300 | -1.71969800 | 2.50358300  |
| N | -3.83685300 | -0.78234800 | 0.67211500  |
| N | -3.77960600 | 1.03289800  | -0.86593100 |
| C | -5.21038600 | 1.29776200  | -1.06654900 |
| H | -5.59401600 | 0.77954700  | -1.93535700 |
| H | -5.77161100 | 1.01944000  | -0.19100200 |
| H | -5.32892300 | 2.36137400  | -1.21182300 |
| C | -5.12565300 | -1.40931000 | 0.35331800  |
| H | -5.91163500 | -1.03871400 | 0.99745500  |
| H | -5.38407300 | -1.24959500 | -0.67963700 |
| H | -5.02038500 | -2.47271700 | 0.51099900  |
| C | 0.38765600  | -2.48430400 | -1.29693400 |
| H | -0.17689200 | -3.34312900 | -0.95739000 |
| H | 0.16868300  | -2.37108600 | -2.35349500 |
| C | 1.89684500  | -2.79453100 | -1.11620500 |
| H | 2.12619200  | -2.89203200 | -0.06053800 |
| H | 2.09494200  | -3.76435500 | -1.55721300 |
| C | 2.84730500  | -1.76021200 | -1.77225100 |
| H | 2.29103100  | -1.02163300 | -2.33089400 |
| H | 3.48437200  | -2.25807900 | -2.48550300 |
| N | 3.77952400  | -1.03295100 | -0.86585000 |
| C | 3.27963900  | -0.19915200 | 0.01283700  |
| C | 5.21031200  | -1.29781800 | -1.06650400 |
| N | 3.83685500  | 0.78238600  | 0.67204400  |
| H | 5.59386600  | -0.77972200 | -1.93541600 |
| H | 5.77160000  | -1.01934700 | -0.19104800 |
| H | 5.32885500  | -2.36145100 | -1.21162000 |
| C | 3.09162900  | 1.41267300  | 1.79183900  |
| C | 5.12569800  | 1.40921000  | 0.35314300  |
| C | 2.20573000  | 2.61823800  | 1.38628500  |
| H | 2.51413000  | 0.64231500  | 2.27849100  |
| H | 3.84404500  | 1.72001700  | 2.50335100  |
| H | 5.91162900  | 1.03878700  | 0.99744400  |
| H | 5.38417300  | 1.24915600  | -0.67974800 |
| H | 5.02046100  | 2.47267000  | 0.51047900  |
| C | 0.68632500  | 2.41222400  | 1.61551300  |
| H | 2.38244600  | 2.85749700  | 0.34308400  |
| H | 2.51240500  | 3.48751800  | 1.95627400  |
| H | 0.50216500  | 2.27053800  | 2.67497900  |
| H | 0.17661700  | 3.32626200  | 1.33709400  |
| H | -2.24189200 | 0.34502700  | 0.22624200  |
| H | 2.24186000  | -0.34500700 | 0.22636800  |
